# Supplementary material
Source: Research Square preprint supplement (doi:10.21203/rs.3.rs-9319391/v1)

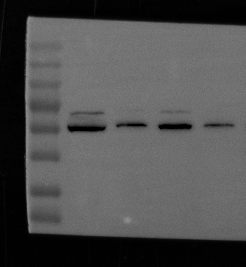


Original full membrane of WWTR1


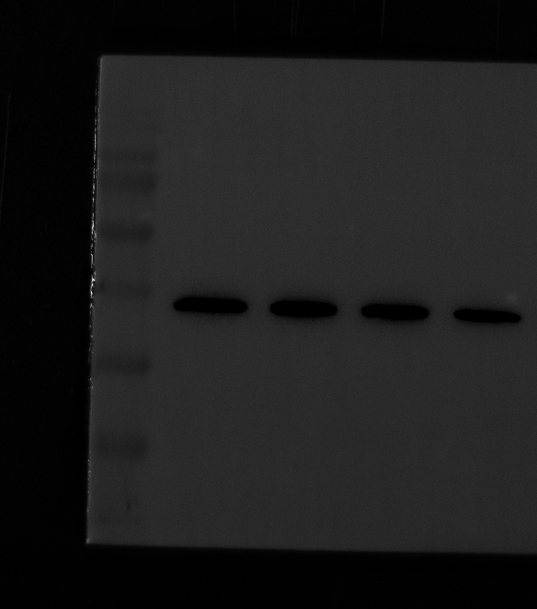


Original full membrane of β-actin

Supplement: Supplementary file 1 [file d0f5de679f94d2eb23b93d8f.docx]
